# Supplementary material
Source: Springer Nature journal article supplement (https://www.springermedizin.de/resource/supplementary/12971_2011_118_MOESM1_ESM.pdf/9595424)

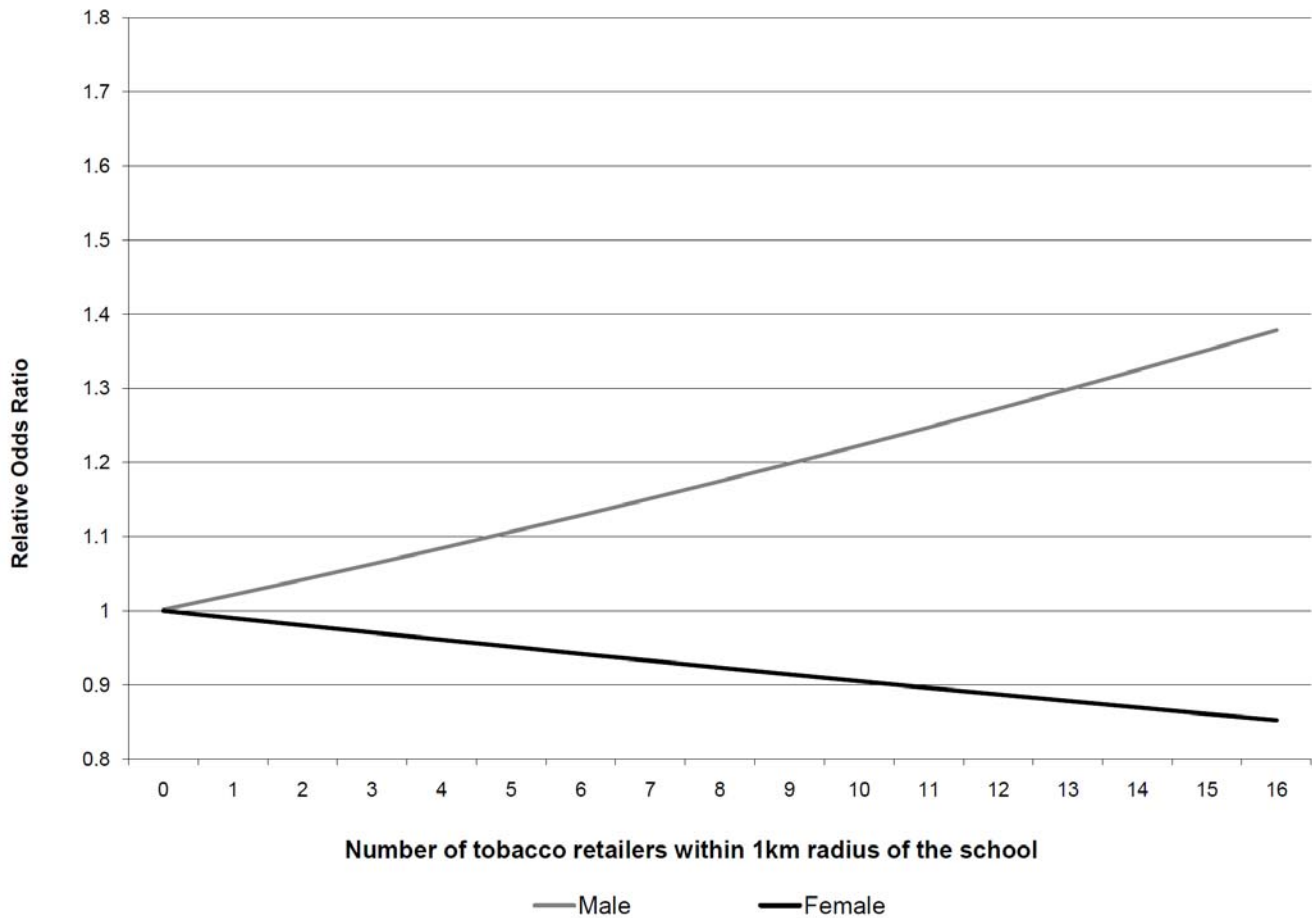

Supplement: MOESM1 [file 9595424]
